# Supplementary material for: Interaction of Psychopathic Traits Dimensions in the Prediction of Psychological and Physical Child-to-Parent Violence in Adolescents
Source: Springer Nature journal article supplement (doi:10.1007/s10862-021-09940-w), 2021-11-04
Supplement: MOESM1 [file 19830468]

All data are available in: https://osf.io/65vym/
